# Supplementary material for: Genome-wide association studies for production, respiratory disease, and immune-related traits in Landrace pigs
Source: PubMed Central journal article supplement (PMC8338966; doi:10.1038/s41598-021-95339-2), 2021-08-04
Supplement: 41598_2021_95339_MOESM3_ESM.pdf [file 41598_2021_95339_MOESM3_ESM.pdf]

# **Genome-wide association studies for production, respiratory disease, and immune-related traits in Landrace pigs**

**Yoshinobu Uemoto<sup>1†\*</sup>, Kasumi Ichinoseki<sup>1†</sup>, Toshimi Matsumoto<sup>2</sup>, Nozomi Oka<sup>3</sup>, Hironori Takamori<sup>3</sup>, Hiroshi Kadowaki<sup>3</sup>, Chihiro Kojima-Shibata<sup>3</sup>, Eisaku Suzuki<sup>3</sup>, Toshihiro Okamura<sup>4</sup>, Hisashi Aso<sup>1</sup>, Haruki Kitazawa<sup>1</sup>, Masahiro Satoh<sup>1</sup>, Hirohide Uenishi<sup>2</sup>, Keiichi Suzuki<sup>1</sup>**

<sup>1</sup>Graduate School of Agricultural Science, Tohoku University, Sendai, Miyagi 980-8572, Japan.

<sup>2</sup>Animal Bioregulation Unit, Division of Animal Sciences, Institute of Agrobiological Sciences, National Agriculture and Food Research Organization (NARO), Tsukuba, Ibaraki 305-8634, Japan

<sup>3</sup>Miyagi Prefecture Animal Industry Experiment Station, Osaki, Miyagi 989-6445, Japan

<sup>4</sup>Institute of Livestock and Grassland Science, NARO, Tsukuba, Ibaraki 305-0901, Japan

†These authors have contributed equally to this work and share first authorship.

\*Correspondence author

## Supplementary Figure

Figure S3. Manhattan plot representing the haplotype-based genome-wide suggestive association with interferon (IFN)- $\gamma$  at 105 kg body weight in Landrace pigs.

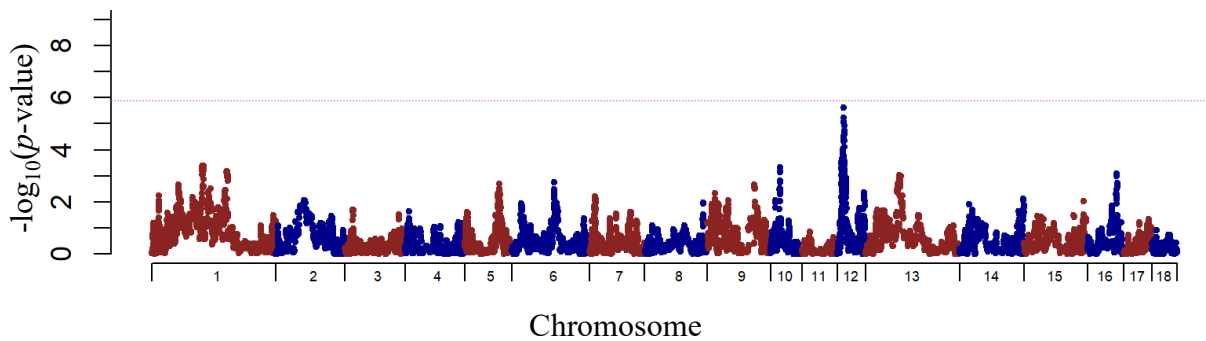

**Figure S3. Manhattan plot representing the haplotype-based genome-wide suggestive association with interferon (IFN)- $\gamma$  at 105 kg body weight in Landrace pigs.** The x-axis indicates the chromosome number and the y-axis indicates  $-\log_{10}(p\text{-value})$ . The dotted horizontal line indicates the significant threshold.
