# Supplementary material for: Genome-wide association studies for production, respiratory disease, and immune-related traits in Landrace pigs
Source: PubMed Central journal article supplement (PMC8338966; doi:10.1038/s41598-021-95339-2), 2021-08-04
Supplement: 41598_2021_95339_MOESM4_ESM.pdf [file 41598_2021_95339_MOESM4_ESM.pdf]

# Genome-wide association studies for production, respiratory disease, and immune-related traits in Landrace pigs

**Yoshinobu Uemoto<sup>1\*</sup>, Kasumi Ichinoseki<sup>1†</sup>, Toshimi Matsumoto<sup>2</sup>, Nozomi Oka<sup>3</sup>, Hironori Takamori<sup>3</sup>, Hiroshi Kadowaki<sup>3</sup>, Chihiro Kojima-Shibata<sup>3</sup>, Eisaku Suzuki<sup>3</sup>, Toshihiro Okamura<sup>4</sup>, Hisashi Aso<sup>1</sup>, Haruki Kitazawa<sup>1</sup>, Masahiro Satoh<sup>1</sup>, Hirohide Uenishi<sup>2</sup>, Keiichi Suzuki<sup>1</sup>**

<sup>1</sup>Graduate School of Agricultural Science, Tohoku University, Sendai, Miyagi 980-8572, Japan.

<sup>2</sup>Animal Bioregulation Unit, Division of Animal Sciences, Institute of Agrobiological Sciences, National Agriculture and Food Research Organization (NARO), Tsukuba, Ibaraki 305-8634, Japan

<sup>3</sup>Miyagi Prefecture Animal Industry Experiment Station, Osaki, Miyagi 989-6445, Japan

<sup>4</sup>Institute of Livestock and Grassland Science, NARO, Tsukuba, Ibaraki 305-0901, Japan

†These authors have contributed equally to this work and share first authorship.

\*Correspondence author

Supplementary table

Table S1. The genome-wide suggestive single nucleotide polymorphisms (SNPs) associated with production, respiratory disease, and immune-related traits.

Table S1. The genome-wide suggestive single nucleotide polymorphisms (SNPs) associated with production, respiratory disease, and immune-related traits

| Traits <sup>a</sup>       | SNP information <sup>b</sup> |              |                     |             | SNP effect |               |                         | Gene symbol within the SNP ±200 kbp region |                                                                          |                                                                                 |
|---------------------------|------------------------------|--------------|---------------------|-------------|------------|---------------|-------------------------|--------------------------------------------|--------------------------------------------------------------------------|---------------------------------------------------------------------------------|
|                           | SSC                          | Position(bp) | refSNP variation ID | EA          | EAF        | $\beta^c$     | Proportion <sup>d</sup> |                                            | <i>p</i> -value                                                          |                                                                                 |
| Production traits         |                              |              |                     |             |            |               |                         |                                            |                                                                          |                                                                                 |
| TDG                       | 2                            | 1,267,622    | rs81243163          | G           | 0.19       | 17.04 (3.68)  | 0.03                    | 4.27E-06                                   | IFITM10,CTSD,SYT8,TNNI2,LSP1,PRR33,TNNT3                                 |                                                                                 |
|                           | 12                           | 60,871,978   | rs81288566          | A           | 0.06       | -27.89 (5.81) | 0.03                    | 1.87E-06                                   | TOMIL2,SREBF1,RAI1,PEMT,RASD1,MED9,NT5M,COPS3,FLCN,PLD6                  |                                                                                 |
| BF                        | 12                           | 61,215,277   | rs81255656          | A           | 0.06       | -27.28 (5.78) | 0.03                    | 2.78E-06                                   | COPS3,FLCN,PLD6,MPRIIP,TNFRSF13B,USP22,DHRS7B,TMEM11,NATD1,MAP2K3        |                                                                                 |
|                           | 14                           | 13,891,794   | rs80983361          | A           | 0.06       | -26.92 (6.04) | 0.03                    | 9.34E-06                                   | MSRA,PRSS55,C8orf74,SOX7,XKR6                                            |                                                                                 |
|                           | 1                            | 147,654,193  | rs81240401          | A           | 0.45       | 1.21 (0.27)   | 0.06                    | 1.20E-05                                   | GALR1,MBP,ZNF236                                                         |                                                                                 |
|                           | 1                            | 148,327,912  | rs81349009          | G           | 0.47       | 1.27 (0.27)   | 0.07                    | 4.15E-06                                   | -                                                                        |                                                                                 |
|                           | 1                            | 148,387,133  | rs81251179          | A           | 0.47       | 1.27 (0.27)   | 0.07                    | 4.15E-06                                   | -                                                                        |                                                                                 |
|                           | 1                            | 148,497,978  | rs81349012          | A           | 0.22       | -1.56 (0.37)  | 0.07                    | 2.56E-05                                   | -                                                                        |                                                                                 |
|                           | 1                            | 148,839,311  | rs81349042          | A           | 0.31       | 1.38 (0.29)   | 0.07                    | 3.43E-06                                   | TSHZ1,ZADH2                                                              |                                                                                 |
|                           | 1                            | 155,492,432  | rs80986448          | G           | 0.21       | -1.71 (0.38)  | 0.08                    | 7.30E-06                                   | CDH19                                                                    |                                                                                 |
|                           | 1                            | 157,498,487  | rs81349201          | C           | 0.49       | -1.22 (0.28)  | 0.06                    | 1.41E-05                                   | -                                                                        |                                                                                 |
|                           | 1                            | 162,105,226  | rs80991377          | C           | 0.44       | -1.30 (0.29)  | 0.07                    | 1.05E-05                                   | ZNF532,MALT1,ALPK2                                                       |                                                                                 |
|                           | 1                            | 162,147,201  | rs80978205          | G           | 0.49       | -1.21 (0.28)  | 0.06                    | 1.32E-05                                   | ZNF532,MALT1,ALPK2                                                       |                                                                                 |
|                           | 1                            | 162,192,627  | rs81349302          | G           | 0.50       | -1.25 (0.27)  | 0.06                    | 6.60E-06                                   | MALT1,ALPK2,NEDD4L                                                       |                                                                                 |
|                           | Respiratory disease traits   | 1            | 162,372,950         | rs80896334  | A          | 0.48          | -1.26 (0.29)            | 0.07                                       | 1.28E-05                                                                 | ALPK2,NEDD4L                                                                    |
| 1                         |                              | 163,382,446  | rs80864027          | A           | 0.22       | -1.75 (0.40)  | 0.09                    | 1.69E-05                                   | CLPX,CILP,PARP16,IGDCC3,IGDCC4,DPP8,HACD3,INTS14                         |                                                                                 |
| 0.00                      |                              |              |                     |             |            |               |                         |                                            |                                                                          |                                                                                 |
| MPS score                 |                              | 2            | 136,232,960         | rs81222517  | A          | 0.45          | -0.13 (0.03)            | 0.04                                       | 2.18E-05                                                                 | C5orf15,TCF7                                                                    |
|                           |                              | 7            | 107,229,684         | rs336042505 | A          | 0.44          | 0.13 (0.03)             | 0.04                                       | 2.30E-05                                                                 | -                                                                               |
|                           |                              | 8            | 24,735,805          | rs81398421  | C          | 0.06          | -0.25 (0.06)            | 0.03                                       | 2.06E-05                                                                 | -                                                                               |
| 0.00                      |                              |              |                     |             |            |               |                         |                                            |                                                                          |                                                                                 |
| Immune-related traits     |                              |              |                     |             |            |               |                         |                                            |                                                                          |                                                                                 |
| PA_7w                     |                              | 8            | 6,537,938           | rs81343316  | A          | 0.46          | 0.05 (0.01)             | 0.01                                       | 2.03E-05                                                                 | SLC2A9,WDR1,ZNF518B,CLNK                                                        |
|                           |                              | 13           | 140,375,976         | rs322548798 | G          | 0.31          | 0.06 (0.01)             | 0.02                                       | 5.76E-06                                                                 | GSK3B,NR1I2                                                                     |
|                           |                              | 13           | 140,376,953         | rs331134940 | G          | 0.31          | 0.06 (0.01)             | 0.02                                       | 7.31E-06                                                                 | GSK3B,NR1I2                                                                     |
|                           |                              | 13           | 140,411,493         | rs81448510  | A          | 0.31          | 0.06 (0.01)             | 0.02                                       | 7.31E-06                                                                 | GSK3B,NR1I2,COX17,POPDC2                                                        |
|                           |                              | 13           | 140,452,426         | rs80842494  | A          | 0.31          | 0.06 (0.01)             | 0.02                                       | 7.31E-06                                                                 | GSK3B,NR1I2,COX17,POPDC2,PLA1A                                                  |
|                           | 13                           | 140,474,261  | rs80796660          | C           | 0.31       | 0.06 (0.01)   | 0.02                    | 7.31E-06                                   | GSK3B,NR1I2,COX17,POPDC2,PLA1A                                           |                                                                                 |
|                           | CAPA_105                     | 13           | 160,080,510         | rs80802927  | A          | 0.17          | 0.07 (0.02)             | 0.01                                       | 2.61E-05                                                                 | DCBLD2,ST3GAL6                                                                  |
|                           |                              | 3            | 26,483,338          | rs81475132  | C          | 0.06          | -0.15 (0.03)            | 0.03                                       | 2.11E-06                                                                 | TMC5,TMC7,COQ7,ITPRIPL2,SYT17,SMG1                                              |
|                           |                              | 3            | 26,981,476          | rs81475348  | A          | 0.06          | -0.15 (0.03)            | 0.03                                       | 2.11E-06                                                                 | XYLT1                                                                           |
|                           | WBC_105                      | 3            | 27,180,639          | rs81243013  | A          | 0.06          | -0.15 (0.03)            | 0.03                                       | 2.11E-06                                                                 | XYLT1                                                                           |
|                           |                              | 2            | 58,888,838          | rs81487680  | G          | 0.30          | -0.02 (0.01)            | 0.04                                       | 4.75E-06                                                                 | MEF2B,TMEM161A,ARMC6,SUGP2,DDX49,UPF1,COMP,CRTC1                                |
|                           |                              | 2            | 59,738,035          | rs322217417 | A          | 0.29          | -0.02 (0.01)            | 0.04                                       | 2.53E-05                                                                 | RAB3A,MPV17L2,IFI30,MAST3,IL12RB1,ARRDC2,KCNN1,CCDC124,SLC5A5,JAK3,INSL3,B3GNT3 |
|                           | WBC_7w                       | 2            | 60,108,314          | rs81359730  | G          | 0.30          | -0.02 (0.01)            | 0.04                                       | 4.46E-06                                                                 | JAK3,INSL3,B3GNT3,FCHO1,MAP1S,COLGALT1,FAM129C,SLC27A1,NXNL1,MVB12A,BST2        |
| 2                         |                              | 62,246,385   | rs80992257          | G           | 0.30       | -0.02 (0.01)  | 0.04                    | 2.79E-06                                   | CYP4F22,PGLYRP2,RASAL3,AKAP8L,AKAP8,BRD4,EPHX3,NOTCH3,ILVBL,SYDE1        |                                                                                 |
| 2                         |                              | 39,149,929   | rs81357548          | A           | 0.45       | 0.02 (0.01)   | 0.03                    | 3.80E-06                                   | PRMT3,HTATIP2,DBX1,NAV2                                                  |                                                                                 |
| RGL_105                   | 2                            | 39,217,661   | rs81357600          | A           | 0.42       | 0.02 (0.01)   | 0.02                    | 1.87E-05                                   | PRMT3,HTATIP2,DBX1,NAV2                                                  |                                                                                 |
|                           | 2                            | 52,791,773   | rs81237218          | G           | 0.13       | -0.03 (0.01)  | 0.02                    | 1.27E-05                                   | -                                                                        |                                                                                 |
|                           | 7                            | 18,172,398   | rs80807040          | G           | 0.06       | -0.08 (0.02)  | 0.02                    | 1.52E-05                                   | -                                                                        |                                                                                 |
| CORT_105                  | 7                            | 18,645,244   | rs80981748          | A           | 0.10       | -0.06 (0.01)  | 0.02                    | 3.58E-06                                   | -                                                                        |                                                                                 |
|                           | 7                            | 19,658,767   | rs80932009          | A           | 0.21       | -0.05 (0.01)  | 0.03                    | 2.23E-06                                   | TDP2,ACOT13,C6orf62,GMNN,ARMH2                                           |                                                                                 |
|                           | 9                            | 124,790,147  | rs81417044          | A           | 0.37       | 0.04 (0.01)   | 0.03                    | 2.03E-05                                   | NMNAT2,SMG7,NCF2,ARPC5,RGL1,APOBEC4                                      |                                                                                 |
| CORT_7w                   | 1                            | 11,684,450   | rs80923830          | A           | 0.39       | 0.08 (0.02)   | 0.03                    | 1.67E-05                                   | NOX3,TFB1M,CLDN20,TIAM2                                                  |                                                                                 |
|                           | 5                            | 80,818,426   | rs81245792          | G           | 0.34       | 0.09 (0.02)   | 0.03                    | 3.58E-06                                   | NT5DC3                                                                   |                                                                                 |
|                           | 5                            | 80,820,281   | rs81339682          | G           | 0.34       | 0.09 (0.02)   | 0.03                    | 4.58E-06                                   | NT5DC3                                                                   |                                                                                 |
| IFN- $\gamma$             | 9                            | 22,071,228   | rs81343906          | G           | 0.27       | 0.09 (0.02)   | 0.04                    | 5.69E-06                                   | GRM5                                                                     |                                                                                 |
|                           | 9                            | 22,573,159   | rs81336772          | G           | 0.48       | 0.07 (0.02)   | 0.03                    | 1.76E-05                                   | GRM5,TYR,NOX4                                                            |                                                                                 |
|                           | 9                            | 22,763,662   | rs81321075          | G           | 0.23       | 0.09 (0.02)   | 0.03                    | 5.53E-06                                   | TYR,NOX4,FOLH1B                                                          |                                                                                 |
| TNF- $\alpha$             | 9                            | 43,420,493   | rs81410136          | G           | 0.16       | -0.10 (0.02)  | 0.03                    | 1.22E-05                                   | -                                                                        |                                                                                 |
|                           | 9                            | 43,705,584   | rs81410215          | G           | 0.16       | -0.10 (0.02)  | 0.03                    | 6.48E-06                                   | -                                                                        |                                                                                 |
|                           | 9                            | 43,739,452   | rs81410233          | A           | 0.17       | -0.10 (0.02)  | 0.04                    | 3.42E-06                                   | -                                                                        |                                                                                 |
| AP                        | 9                            | 86,743,853   | rs341975939         | G           | 0.28       | 0.10 (0.02)   | 0.03                    | 1.54E-05                                   | AHR                                                                      |                                                                                 |
|                           | 15                           | 108,645,898  | rs80990650          | G           | 0.25       | 0.10 (0.02)   | 0.03                    | 2.37E-05                                   | PARD3B                                                                   |                                                                                 |
|                           | 12                           | 7,283,888    | rs81437363          | G           | 0.17       | -0.24 (0.06)  | 0.04                    | 2.49E-05                                   | -                                                                        |                                                                                 |
| IL-17                     | 12                           | 10,974,664   | rs81439586          | A           | 0.50       | 0.22 (0.05)   | 0.05                    | 2.09E-05                                   | MAP2K6,ABCA5                                                             |                                                                                 |
|                           | 12                           | 11,004,527   | rs81439595          | G           | 0.40       | -0.22 (0.05)  | 0.05                    | 1.31E-05                                   | MAP2K6,ABCA5                                                             |                                                                                 |
|                           | 12                           | 13,502,838   | rs81440208          | A           | 0.25       | 0.28 (0.06)   | 0.07                    | 5.96E-06                                   | CACNG5,CACNG4,CACNG1,HELZ                                                |                                                                                 |
| Multi-trait meta-analysis | 14                           | 3,711,824    | rs81327634          | G           | 0.50       | -0.17 (0.04)  | 0.08                    | 1.35E-05                                   | -                                                                        |                                                                                 |
|                           | 14                           | 17,600,242   | rs341122035         | C           | 0.47       | -0.19 (0.04)  | 0.09                    | 2.40E-06                                   | -                                                                        |                                                                                 |
|                           | 16                           | 68,422,227   | rs81461701          | G           | 0.17       | 0.22 (0.05)   | 0.07                    | 1.27E-05                                   | MRPL22,GEMIN5,CNOT8,FAXDC2,LARP1                                         |                                                                                 |
| Multi-trait meta-analysis | 16                           | 68,425,822   | rs81347008          | A           | 0.17       | 0.22 (0.05)   | 0.07                    | 1.27E-05                                   | MRPL22,GEMIN5,CNOT8,FAXDC2,LARP1                                         |                                                                                 |
|                           | 2                            | 1,267,622    | rs81243163          |             |            |               |                         | 1.37E-05                                   | IFITM10,CTSD,SYT8,TNNI2,LSP1,PRR33,TNNT3                                 |                                                                                 |
|                           | 2                            | 60,108,314   | rs81359730          |             |            |               |                         | 2.16E-05                                   | JAK3,INSL3,B3GNT3,FCHO1,MAP1S,COLGALT1,FAM129C,SLC27A1,NXNL1,MVB12A,BST2 |                                                                                 |
|                           | 3                            | 26,483,338   | rs81475132          |             |            |               |                         | 1.36E-06                                   | TMC5,TMC7,COQ7,ITPRIPL2,SYT17,SMG1                                       |                                                                                 |
|                           | 3                            | 26,981,476   | rs81475348          |             |            |               |                         | 1.36E-06                                   | XYLT1                                                                    |                                                                                 |
|                           | 3                            | 27,180,639   | rs81243013          |             |            |               |                         | 1.36E-06                                   | XYLT1                                                                    |                                                                                 |
|                           | 4                            | 7,783,321    | rs80920273          |             |            |               |                         | 1.65E-05                                   | ST3GAL1                                                                  |                                                                                 |
| Multi-trait meta-analysis | 7                            | 115,550,783  | rs80918930          |             |            |               |                         | 1.04E-05                                   | ISG12(A),PPP4R4,SERPINA6,SERPINA1,SERPINA11,UABP-2,SERPINA12             |                                                                                 |
|                           | 10                           | 63,410,258   | rs81236875          |             |            |               |                         | 2.53E-05                                   | GATA3,TAF3,ATP5F1C,KIN                                                   |                                                                                 |

<sup>a</sup>Abbreviations of traits are shown in Table 2.<sup>b</sup>SSC: Sus Scrofa chromosome, EA: Effect allele, EAF: Effect allele frequency.<sup>c</sup>Standard errors are shown in parentheses.<sup>d</sup>The proportion of adjusted phenotypic variance explained by the SNP effects.
