# Supplementary material for: Genome-wide association studies for production, respiratory disease, and immune-related traits in Landrace pigs
Source: PubMed Central journal article supplement (PMC8338966; doi:10.1038/s41598-021-95339-2), 2021-08-04
Supplement: 41598_2021_95339_MOESM5_ESM.pdf [file 41598_2021_95339_MOESM5_ESM.pdf]

# **Genome-wide association studies for production, respiratory disease, and immune-related traits in Landrace pigs**

**Yoshinobu Uemoto<sup>1†\*</sup>, Kasumi Ichinoseki<sup>1†</sup>, Toshimi Matsumoto<sup>2</sup>, Nozomi Oka<sup>3</sup>, Hironori Takamori<sup>3</sup>, Hiroshi Kadowaki<sup>3</sup>, Chihiro Kojima-Shibata<sup>3</sup>, Eisaku Suzuki<sup>3</sup>, Toshihiro Okamura<sup>4</sup>, Hisashi Aso<sup>1</sup>, Haruki Kitazawa<sup>1</sup>, Masahiro Satoh<sup>1</sup>, Hirohide Uenishi<sup>2</sup>, Keiichi Suzuki<sup>1</sup>**

<sup>1</sup>Graduate School of Agricultural Science, Tohoku University, Sendai, Miyagi 980-8572, Japan.

<sup>2</sup>Animal Bioregulation Unit, Division of Animal Sciences, Institute of Agrobiological Sciences, National Agriculture and Food Research Organization (NARO), Tsukuba, Ibaraki 305-8634, Japan

<sup>3</sup>Miyagi Prefecture Animal Industry Experiment Station, Osaki, Miyagi 989-6445, Japan

<sup>4</sup>Institute of Livestock and Grassland Science, NARO, Tsukuba, Ibaraki 305-0901, Japan

†These authors have contributed equally to this work and share first authorship.

\*Correspondence author

Supplementary table

Table S2. The genome-wide suggestive and significant single nucleotide polymorphisms (SNPs) associated with immune-related traits for haplotype-based association study.

Table S2. The genome-wide suggestive and significant single nucleotide polymorphisms (SNPs) associated with immune-related traits for haplotype-based association study

| Traits <sup>a</sup> | SSC <sup>b</sup> | Position(bp) | refSNP<br>variation ID | <i>p</i> -value <sup>c</sup> | Gene symbol within the SNP ±200 kbp region                            |
|---------------------|------------------|--------------|------------------------|------------------------------|-----------------------------------------------------------------------|
| CORT_105            | 7                | 114,409,265  | rs80859105             | 4.49E-06 *                   | RIN3,LGMN,GOLGA5,CHGA,ITPK1,TMEM251,GON7,UBR7                         |
|                     | 7                | 114,460,289  | rs80843547             | 1.37E-05 *                   | RIN3,GOLGA5,CHGA,ITPK1,TMEM251,GON7,UBR7,BTBD7                        |
|                     | 7                | 114,480,337  | rs80803653             | 1.37E-05 *                   | RIN3,CHGA,ITPK1,TMEM251,GON7,UBR7,BTBD7                               |
|                     | 7                | 114,517,322  | rs80792520             | 1.37E-05 *                   | RIN3,CHGA,ITPK1,TMEM251,GON7,UBR7,BTBD7                               |
|                     | 7                | 114,585,094  | rs80971641             | 6.52E-06 *                   | RIN3,ITPK1,TMEM251,GON7,UBR7,BTBD7                                    |
|                     | 7                | 114,607,342  | rs80840002             | 6.52E-06 *                   | RIN3,ITPK1,TMEM251,GON7,UBR7,BTBD7                                    |
|                     | 7                | 114,674,294  | rs341043600            | 5.64E-06 *                   | RIN3,ITPK1,TMEM251,GON7,UBR7,BTBD7                                    |
|                     | 7                | 114,999,265  | rs80889242             | 5.87E-06 *                   | PRIMA1                                                                |
|                     | 7                | 115,347,654  | rs330303348            | 3.27E-07 **                  | ASB2,CCDC197,OTUB2,DDX24,ISG12(A),PPP4R4,SERPINA6                     |
|                     | 7                | 115,550,783  | rs80918930             | 4.21E-07 **                  | ISG12(A),PPP4R4,SERPINA6,SERPINA1,SERPINA11,UABP-2,SERPINA12          |
|                     | 7                | 115,571,143  | rs80966458             | 4.21E-07 **                  | PPP4R4,SERPINA6,SERPINA1,SERPINA11,UABP-2,SERPINA12                   |
|                     | 7                | 115,603,615  | rs80873210             | 1.82E-07 **                  | PPP4R4,SERPINA6,SERPINA1,SERPINA11,UABP-2,SERPINA12,SERPINA4,SERPINA5 |
|                     | 7                | 115,616,606  | rs80825941             | 1.82E-07 **                  | PPP4R4,SERPINA6,SERPINA1,SERPINA11,UABP-2,SERPINA12,SERPINA4,SERPINA5 |
|                     | 7                | 115,679,840  | rs80953170             | 3.96E-07 **                  | PPP4R4,SERPINA6,SERPINA1,SERPINA11,UABP-2,SERPINA12,SERPINA4,SERPINA5 |
|                     | 7                | 115,749,343  | rs80822022             | 1.31E-07 **                  | SERPINA6,SERPINA1,SERPINA11,UABP-2,SERPINA12,SERPINA4,SERPINA5        |
|                     | 7                | 115,760,859  | rs80893020             | 1.31E-07 **                  | SERPINA1,SERPINA11,UABP-2,SERPINA12,SERPINA4,SERPINA5                 |
|                     | 7                | 115,823,340  | rs80810258             | 2.26E-07 **                  | SERPINA11,UABP-2,SERPINA12,SERPINA4,SERPINA5,SERPINA3-2               |
|                     | 7                | 115,973,303  | rs80937516             | 1.90E-07 **                  | SERPINA4,SERPINA5,SERPINA3-2,GSC                                      |
|                     | 7                | 116,000,136  | rs80948347             | 7.67E-08 **                  | SERPINA5,SERPINA3-2,GSC                                               |
|                     | 7                | 118,819,341  | rs80869079             | 2.02E-05 *                   | -                                                                     |
|                     | 7                | 118,832,173  | rs80849807             | 2.02E-05 *                   | -                                                                     |
|                     | 7                | 118,858,539  | rs80792506             | 2.02E-05 *                   | -                                                                     |
|                     | 7                | 119,030,288  | rs80804399             | 1.98E-05 *                   | -                                                                     |
|                     | 7                | 119,102,986  | rs80852461             | 2.62E-05 *                   | -                                                                     |
|                     | 7                | 119,132,019  | rs80936553             | 1.25E-05 *                   | -                                                                     |
|                     | 7                | 119,190,574  | rs80867008             | 1.03E-05 *                   | -                                                                     |
|                     | 7                | 119,204,491  | rs80848734             | 1.03E-05 *                   | -                                                                     |
|                     | 7                | 119,357,414  | rs80865857             | 1.22E-05 *                   | -                                                                     |
|                     | 7                | 119,457,021  | rs80978493             | 1.22E-05 *                   | -                                                                     |
|                     | 7                | 119,603,213  | rs80876684             | 1.65E-05 *                   | -                                                                     |
|                     | 7                | 120,070,008  | rs80846272             | 1.32E-05 *                   | BCL11B                                                                |
|                     | 7                | 120,096,033  | rs80871510             | 1.32E-05 *                   | BCL11B                                                                |
|                     | 7                | 120,128,804  | rs80994655             | 1.18E-05 *                   | BCL11B                                                                |
| 7                   | 120,141,153      | rs80796024   | 1.59E-05 *             | BCL11B                       |                                                                       |
| IFN-γ               | 12               | 13,502,838   | rs81440208             | 2.49E-06 *                   | CACNG5,CACNG4,CACNG1,HELZ                                             |
|                     | 12               | 13,710,118   | rs81214705             | 9.02E-06 *                   | HELZ,PSMD12,PITPNC1                                                   |
|                     | 12               | 13,799,478   | rs81261131             | 9.02E-06 *                   | HELZ,PSMD12,PITPNC1                                                   |
|                     | 12               | 13,826,063   | rs81440273             | 9.02E-06 *                   | HELZ,PSMD12,PITPNC1                                                   |
|                     | 12               | 13,846,528   | rs81440280             | 8.57E-06 *                   | HELZ,PSMD12,PITPNC1,NOL11                                             |
|                     | 12               | 13,859,215   | rs81440287             | 5.88E-06 *                   | PSMD12,PITPNC1,NOL11                                                  |
|                     | 12               | 14,110,163   | rs81440328             | 2.25E-05 *                   | PITPNC1,NOL11,BPTF,C17orf58,KPNA2                                     |
|                     | 12               | 14,204,868   | rs81255563             | 1.23E-05 *                   | PITPNC1,NOL11,BPTF,C17orf58,KPNA2,SMURF2                              |
|                     | 12               | 14,511,766   | rs81216365             | 2.53E-05 *                   | SMURF2,CEP95,DDX5,POLG2,MILR1,PECAM1                                  |
|                     | 12               | 14,655,763   | rs81440391             | 2.13E-05 *                   | SMURF2,CEP95,DDX5,POLG2,MILR1,PECAM1,TEX2                             |
|                     | 12               | 14,709,054   | rs80892486             | 1.85E-05 *                   | CEP95,DDX5,POLG2,MILR1,PECAM1,TEX2,ERN1                               |
|                     | 12               | 14,732,256   | rs81440339             | 2.63E-05 *                   | CEP95,DDX5,POLG2,MILR1,PECAM1,TEX2,ERN1                               |
|                     | 12               | 14,747,002   | rs81440416             | 2.65E-05 *                   | CEP95,DDX5,POLG2,MILR1,PECAM1,TEX2,ERN1                               |

<sup>a</sup>Abbreviations of traits are shown in Table 2.

<sup>b</sup>SSC: Sus Scrofa chromosome.

<sup>c</sup>\*\* : Genome-wide significant level. \* : Genome-wide suggestive level.
