# Supplementary material for: Genome-wide association studies for production, respiratory disease, and immune-related traits in Landrace pigs
Source: PubMed Central journal article supplement (PMC8338966; doi:10.1038/s41598-021-95339-2), 2021-08-04
Supplement: 41598_2021_95339_MOESM6_ESM.pdf [file 41598_2021_95339_MOESM6_ESM.pdf]

## Genome-wide association studies for production, respiratory disease, and immune-related traits in Landrace pigs

**Yoshinobu Uemoto<sup>1†\*</sup>, Kasumi Ichinoseki<sup>1†</sup>, Toshimi Matsumoto<sup>2</sup>, Nozomi Oka<sup>3</sup>, Hironori Takamori<sup>3</sup>, Hiroshi Kadowaki<sup>3</sup>, Chihiro Kojima-Shibata<sup>3</sup>, Eisaku Suzuki<sup>3</sup>, Toshihiro Okamura<sup>4</sup>, Hisashi Aso<sup>1</sup>, Haruki Kitazawa<sup>1</sup>, Masahiro Satoh<sup>1</sup>, Hirohide Uenishi<sup>2</sup>, Keiichi Suzuki<sup>1</sup>**

<sup>1</sup>Graduate School of Agricultural Science, Tohoku University, Sendai, Miyagi 980-8572, Japan.

<sup>2</sup>Animal Bioregulation Unit, Division of Animal Sciences, Institute of Agrobiological Sciences, National Agriculture and Food Research Organization (NARO), Tsukuba, Ibaraki 305-8634, Japan

<sup>3</sup>Miyagi Prefecture Animal Industry Experiment Station, Osaki, Miyagi 989-6445, Japan

<sup>4</sup>Institute of Livestock and Grassland Science, NARO, Tsukuba, Ibaraki 305-0901, Japan

†These authors have contributed equally to this work and share first authorship.

\*Correspondence author

Supplementary table

Table S3. Significant gene ontology (GO) terms and Kyoto Encyclopedia of Genes and Genomes (KEGG) pathways associated with production and immune-related traits ( $p$ -value < 0.05).

Table S3. Significant gene ontology (GO) terms and Kyoto Encyclopedia of Genes and Genomes (KEGG) pathways associated with production and immune-related traits ( $p$ -value < 0.05)

| Traits <sup>a</sup>       | Database | Term ID    | Term description                                       | Counts | Involved genes                                               | DAVID<br>$p$ -value |
|---------------------------|----------|------------|--------------------------------------------------------|--------|--------------------------------------------------------------|---------------------|
| Production traits         |          |            |                                                        |        |                                                              |                     |
| TDG                       | GO       | GO:0045893 | Positive regulation of transcription, DNA-templated    | 5      | MAP2K3, RAI1, USP22, TNNT2, SOX7                             | 5.71E-03            |
|                           | GO       | GO:0015629 | Actin cytoskeleton                                     | 3      | MSRA, MPRIP, LSP1                                            | 3.57E-02            |
|                           | GO       | GO:0003779 | Actin binding                                          | 4      | MPRIP, TNNT3, TNNT2, LSP1                                    | 7.77E-03            |
| BF                        | GO       | GO:0010951 | Negative regulation of endopeptidase activity          | 3      | SERPINB12, SERPINB13, SERPINB5                               | 8.99E-03            |
|                           | GO       | GO:0004867 | Serine-type endopeptidase inhibitor activity           | 3      | SERPINB12, SERPINB13, SERPINB5                               | 5.24E-03            |
|                           | GO       | GO:0002020 | Protease binding                                       | 3      | SERPINB13, MBP, MALT1                                        | 5.67E-03            |
| Immune-related traits     |          |            |                                                        |        |                                                              |                     |
| WBC_105                   | GO       | GO:0042826 | Histone deacetylase binding                            | 3      | MEF2B, AKAP8L, AKAP8                                         | 1.59E-02            |
|                           | GO       | GO:0044822 | Poly(A) RNA binding                                    | 7      | BST2, UPF1, DDX49, AKAP8L, CCDC124, AKAP8, SUGP2             | 1.79E-02            |
| RGL_105                   | GO       | GO:0005829 | Cytosol                                                | 6      | NCF2, GMNN, ACOT13, ARPC5, RGL1, SMG7                        | 6.82E-03            |
| CORT_105                  | GO       | GO:0010951 | Negative regulation of endopeptidase activity          | 6      | SERPINA11, SERPINA12, SERPINA1, SERPINA6, SERPINA4, SERPINA5 | 3.40E-08            |
|                           | GO       | GO:0005615 | Extracellular space                                    | 6      | SERPINA11, SERPINA12, SERPINA1, SERPINA6, SERPINA4, SERPINA5 | 2.49E-03            |
|                           | GO       | GO:0004867 | Serine-type endopeptidase inhibitor activity           | 6      | SERPINA11, SERPINA12, SERPINA1, SERPINA6, SERPINA4, SERPINA5 | 7.00E-09            |
| IFN- $\gamma$             | GO       | GO:0061337 | Cardiac conduction                                     | 3      | CACNG1, CACNG4, CACNG5                                       | 4.20E-05            |
|                           | GO       | GO:0070588 | Calcium ion transmembrane transport                    | 3      | CACNG1, CACNG4, CACNG5                                       | 2.96E-04            |
|                           | GO       | GO:0006810 | Transport                                              | 3      | CACNG1, CACNG4, CACNG5                                       | 2.50E-03            |
|                           | GO       | GO:0005245 | Voltage-gated calcium channel activity                 | 3      | CACNG1, CACNG4, CACNG5                                       | 5.45E-05            |
|                           | KEGG     | hsa04010   | MAPK signaling pathway                                 | 4      | CACNG1, CACNG4, CACNG5, MAP2K6                               | 1.91E-04            |
|                           | KEGG     | hsa05412   | Arrhythmogenic right ventricular cardiomyopathy (ARVC) | 3      | CACNG1, CACNG4, CACNG5                                       | 5.54E-04            |
|                           | KEGG     | hsa04260   | Cardiac muscle contraction                             | 3      | CACNG1, CACNG4, CACNG5                                       | 6.94E-04            |
|                           | KEGG     | hsa05410   | Hypertrophic cardiomyopathy (HCM)                      | 3      | CACNG1, CACNG4, CACNG5                                       | 7.50E-04            |
| TNF- $\alpha$             | KEGG     | hsa05414   | Dilated cardiomyopathy                                 | 3      | CACNG1, CACNG4, CACNG5                                       | 8.70E-04            |
|                           | KEGG     | hsa04261   | Adrenergic signaling in cardiomyocytes                 | 3      | CACNG1, CACNG4, CACNG5                                       | 2.33E-03            |
|                           | KEGG     | hsa04921   | Oxytocin signaling pathway                             | 3      | CACNG1, CACNG4, CACNG5                                       | 2.75E-03            |
|                           | GO       | GO:0044822 | Poly(A) RNA binding                                    | 3      | LARP1, GEMIN5, MRPL22                                        | 2.45E-02            |
| Multi-trait meta-analysis |          |            |                                                        |        |                                                              |                     |
|                           | GO       | GO:0010951 | Negative regulation of endopeptidase activity          | 5      | SERPINA11, BST2, SERPINA12, SERPINA1, SERPINA6               | 5.30E-05            |
|                           | GO       | GO:0006914 | Autophagy                                              | 3      | MAP1S, MVB12A, CTSD                                          | 2.20E-02            |
|                           | GO       | GO:0004867 | Serine-type endopeptidase inhibitor activity           | 4      | SERPINA11, SERPINA12, SERPINA1, SERPINA6                     | 4.87E-04            |

<sup>a</sup>Abbreviations of traits are shown in Table 2.
